# Supplementary material
Source: PubMed Central journal article supplement (PMC8688604)
Supplement: 11524_2021_593_MOESM1_ESM.pdf [file 11524_2021_593_MOESM1_ESM.pdf]

## Supplement

Physical Distancing, Violence, and Crime in US Cities during the Coronavirus Pandemic

Julia P. Schleimer,<sup>1,2</sup> Christopher D. McCort,<sup>1,2</sup> Elizabeth A. Tomsich,<sup>1,2</sup> Veronica A. Pear,<sup>1,2</sup>  
Alaina De Biasi,<sup>1,2</sup> Shani Buggs,<sup>1,2</sup> Hannah S. Laqueur,<sup>1,2</sup> Aaron B. Shev,<sup>1,2</sup> Garen J. Wintemute<sup>1,2</sup>

<sup>1</sup>Violence Prevention Research Program, Department of Emergency Medicine, School of  
Medicine, University of California, Davis, Sacramento, CA

<sup>2</sup>California Firearm Violence Research Center, Sacramento, CA

Supplementary Table 1. City open data portals, data sources for police-reported crime incidents

| City                 | Source                                                                                                                                                                                                                                                                                                                                             | Date of access | Notable exclusions and inclusions                                                                                                                                            |
|----------------------|----------------------------------------------------------------------------------------------------------------------------------------------------------------------------------------------------------------------------------------------------------------------------------------------------------------------------------------------------|----------------|------------------------------------------------------------------------------------------------------------------------------------------------------------------------------|
| Baltimore, MD        | <a href="https://data.baltimorecity.gov/datasets/part-1-crime-data-3">https://data.baltimorecity.gov/datasets/part-1-crime-data-3</a>                                                                                                                                                                                                              | November 2020  | Data exclude incidents for which an address could not be geocoded (by Baltimore Police Department)                                                                           |
| Boston, MA           | <a href="https://data.boston.gov/dataset/crime-incident-reports-august-2015-to-date-source-new-system">https://data.boston.gov/dataset/crime-incident-reports-august-2015-to-date-source-new-system</a>                                                                                                                                            | November 2020  |                                                                                                                                                                              |
| Chicago, IL          | <a href="https://data.cityofchicago.org/Public-Safety/Crimes-2001-to-present-Dashboard/5cd6-ry5g">https://data.cityofchicago.org/Public-Safety/Crimes-2001-to-present-Dashboard/5cd6-ry5g</a>                                                                                                                                                      | November 2020  |                                                                                                                                                                              |
| Cincinnati, OH       | <a href="https://data.cincinnati-oh.gov/Safety/PDI-Police-Data-Initiative-Crime-Incidents/k59e-2pvf">https://data.cincinnati-oh.gov/Safety/PDI-Police-Data-Initiative-Crime-Incidents/k59e-2pvf</a>                                                                                                                                                | November 2020  |                                                                                                                                                                              |
| Dallas, TX           | <a href="https://www.dallasopendata.com/Public-Safety/Police-Incidents/qv6i-rri7">https://www.dallasopendata.com/Public-Safety/Police-Incidents/qv6i-rri7</a>                                                                                                                                                                                      | November 2020  | Data exclude: 1) sexually oriented offenses and 2) offenses where juveniles or children (individuals under 17 years of age) are the victim or suspect                        |
| Denver, CO           | <a href="https://www.denvergov.org/opendata/dataset/city-and-county-of-denver-crime">https://www.denvergov.org/opendata/dataset/city-and-county-of-denver-crime</a>                                                                                                                                                                                | November 2020  | Data exclude child abuse cases, and other crimes which by their nature involve juveniles, or which the reports indicate involve juveniles as victims, suspects, or witnesses |
| District of Columbia | <a href="https://opendata.dc.gov/search?categories=crimes%20and%20incidents&amp;q=crime%20incidents">https://opendata.dc.gov/search?categories=crimes%20and%20incidents&amp;q=crime%20incidents</a>                                                                                                                                                | November 2020  |                                                                                                                                                                              |
| Detroit, MI          | <a href="https://data.detroitmi.gov/datasets/rms-crime-incidents?geometry=-83.471%2C42.264%2C-82.727%2C42.442">https://data.detroitmi.gov/datasets/rms-crime-incidents?geometry=-83.471%2C42.264%2C-82.727%2C42.442</a>                                                                                                                            | November 2020  |                                                                                                                                                                              |
| Los Angeles, CA      | <a href="https://data.lacity.org/A-Safe-City/Crime-Data-from-2010-to-2019/63jg-8b9z">https://data.lacity.org/A-Safe-City/Crime-Data-from-2010-to-2019/63jg-8b9z</a> ;<br><a href="https://data.lacity.org/A-Safe-City/Crime-Data-from-2020-to-Present/2nrs-mtv8">https://data.lacity.org/A-Safe-City/Crime-Data-from-2020-to-Present/2nrs-mtv8</a> | November 2020  |                                                                                                                                                                              |

|                   |                                                                                                                                                                                                                                                                                                                                                          |               |                                                                                                   |
|-------------------|----------------------------------------------------------------------------------------------------------------------------------------------------------------------------------------------------------------------------------------------------------------------------------------------------------------------------------------------------------|---------------|---------------------------------------------------------------------------------------------------|
| Milwaukee, WI     | <a href="https://data.milwaukee.gov/dataset/wibr">https://data.milwaukee.gov/dataset/wibr</a> ;<br><a href="https://data.milwaukee.gov/dataset/wibrarchive">https://data.milwaukee.gov/dataset/wibrarchive</a>                                                                                                                                           | November 2020 | Assault includes simple and homicide includes justifiable (these categories cannot be separated). |
| Philadelphia, PA  | <a href="https://www.opendataphilly.org/dataset/crime-incidents">https://www.opendataphilly.org/dataset/crime-incidents</a>                                                                                                                                                                                                                              | November 2020 |                                                                                                   |
| Phoenix, AZ       | <a href="https://www.phoenixopendata.com/dataset/crime-data">https://www.phoenixopendata.com/dataset/crime-data</a>                                                                                                                                                                                                                                      | November 2020 |                                                                                                   |
| Riverside, CA     | <a href="https://riversideca.gov/transparency/data/dataset/show/27/Crime_Reports">https://riversideca.gov/transparency/data/dataset/show/27/Crime_Reports</a>                                                                                                                                                                                            | November 2020 |                                                                                                   |
| Sacramento, CA    | <a href="http://data.cityofsacramento.org/datasets/64279ca193a54189aa9214a29d32520c0">http://data.cityofsacramento.org/datasets/64279ca193a54189aa9214a29d32520c0</a> ;<br><a href="http://data.cityofsacramento.org/search?q=crime%20data&amp;tags=public%20safety">http://data.cityofsacramento.org/search?q=crime%20data&amp;tags=public%20safety</a> | November 2020 |                                                                                                   |
| San Francisco, CA | <a href="https://data.sfgov.org/Public-Safety/Police-Department-Incident-Reports-2018-to-Present/wg3w-h783">https://data.sfgov.org/Public-Safety/Police-Department-Incident-Reports-2018-to-Present/wg3w-h783</a>                                                                                                                                        | November 2020 |                                                                                                   |
| Seattle, WA       | <a href="https://data.seattle.gov/Public-Safety/SPD-Crime-Data-2008-Present/tazs-3rd5">https://data.seattle.gov/Public-Safety/SPD-Crime-Data-2008-Present/tazs-3rd5</a>                                                                                                                                                                                  | November 2020 |                                                                                                   |

Supplementary Table 2. Data sources for exposure, outcomes, and covariates

| Variable                                                                                          | Source & Notes                                                                                                                                                                                                                                                                                                                                                                                                                                                                                                                                                                                                      | Date of access |
|---------------------------------------------------------------------------------------------------|---------------------------------------------------------------------------------------------------------------------------------------------------------------------------------------------------------------------------------------------------------------------------------------------------------------------------------------------------------------------------------------------------------------------------------------------------------------------------------------------------------------------------------------------------------------------------------------------------------------------|----------------|
| <i>Exposure</i>                                                                                   |                                                                                                                                                                                                                                                                                                                                                                                                                                                                                                                                                                                                                     |                |
| Physical distancing                                                                               | Anonymized, aggregated smartphone data from Safegraph measuring change in the percentage of the city population staying completely at home (compared to the week ending February 12, 2020). <sup>1</sup> A smartphone device was considered completely at home in a given day if it did not leave the location (~153m x ~153m cell) in which it spent the majority of nights in the prior 6-week period. <sup>1</sup> Data were provided at the census block group level and we aggregated them to cities. We adjusted for sampling bias using the recommended post-stratification weighting approach. <sup>2</sup> | September 2020 |
| <i>Outcomes</i>                                                                                   |                                                                                                                                                                                                                                                                                                                                                                                                                                                                                                                                                                                                                     |                |
| Incidents of intentional, interpersonal firearm violence                                          | Gun Violence Archive, which compiles incidents of firearm violence from approximately 7,500 sources, including the news media, police, and government. <sup>3</sup> We included incidents of intentional, interpersonal violence in which at least one person was injured or killed.                                                                                                                                                                                                                                                                                                                                | August 2020    |
| Police-reported crime incidents                                                                   | See Supplementary Table 1. We included eight crime types which make up the Federal Bureau of Investigation's Uniform Crime Reporting Part I offenses: criminal homicide, rape, robbery, aggravated assault, burglary, larceny-theft, motor vehicle theft, and arson.                                                                                                                                                                                                                                                                                                                                                | November 2020  |
| <i>Covariates</i>                                                                                 |                                                                                                                                                                                                                                                                                                                                                                                                                                                                                                                                                                                                                     |                |
| Incidents of police violence at protests against the killing of George Floyd, per city population | Crowdsourced database of police brutality during the 2020 protests against the killing of George Floyd. <sup>4</sup>                                                                                                                                                                                                                                                                                                                                                                                                                                                                                                | August 2020    |
| Attendees at protests related to racial justice and policing per city population                  | Count love, <sup>5</sup> which compiles data on protests from local newspaper and television sites. We included events in support of racial justice and greater police accountability and, separately, events in support of white supremacy, other far-right causes, and police.                                                                                                                                                                                                                                                                                                                                    | August 2020    |
| COVID-19 cases and deaths per county population                                                   | Johns Hopkins University Center for Systems Science and Engineering time series of cumulative cases and deaths <sup>6</sup> (data are at the county level).                                                                                                                                                                                                                                                                                                                                                                                                                                                         | August 2020    |
| Temperature (degrees Fahrenheit) and precipitation (inches)                                       | PRISM Climate Group, Oregon State University. <sup>7</sup> Bulk download requires latitude and longitude; we used the latitude and longitude of city capitals.                                                                                                                                                                                                                                                                                                                                                                                                                                                      | August 2020    |
| Stay-home orders                                                                                  | National league of cities' COVID-19: Local Action Tracker <sup>8</sup> and other local news outlets. State orders were used in the absence of city orders or information on their dates.                                                                                                                                                                                                                                                                                                                                                                                                                            | August 2020    |
| City population size                                                                              | US Census City and Town Population Totals: 2010-2019. Estimates for 2020 were extrapolated with cubic regression.                                                                                                                                                                                                                                                                                                                                                                                                                                                                                                   | May 2020       |

Supplementary Table 3. Average weekly rates of violence and crime prior to and during the coronavirus pandemic, 16 US cities<sup>a</sup> January 2018 through July 2020

| <b>Outcome (weekly rate per 100,000 city population), mean (SD)</b> | <b>Pre-Pandemic<sup>b</sup></b> | <b>Pandemic<sup>c</sup></b> |
|---------------------------------------------------------------------|---------------------------------|-----------------------------|
| Aggravated Assault                                                  | 9.5 (8.8)                       | 10.2 (10.0)                 |
| Arson <sup>d</sup>                                                  | 0.5 (0.5)                       | 0.6 (0.6)                   |
| Burglary                                                            | 12.6 (6.3)                      | 11.9 (7.5)                  |
| Homicide                                                            | 0.3 (0.3)                       | 0.4 (0.4)                   |
| Interpersonal firearm violence                                      | 0.7 (0.8)                       | 1.0 (1.2)                   |
| Larceny-theft                                                       | 46.0 (22.5)                     | 34.8 (14.0)                 |
| Motor vehicle theft                                                 | 9.2 (4.6)                       | 9.5 (4.8)                   |
| Rape <sup>e</sup>                                                   | 1.0 (0.7)                       | 0.7 (0.5)                   |
| Robbery                                                             | 5.6 (3.5)                       | 4.2 (2.4)                   |

<sup>a</sup>Cities included: Baltimore, MD; Boston, MA; Chicago, IL; Cincinnati, OH; Dallas, TX; Denver, CO; Detroit, MI; District of Columbia; Los Angeles, CA; Milwaukee, WI; Philadelphia, PA; Phoenix, AZ; Riverside, CA; Sacramento, CA; San Francisco, CA; and Seattle, WA.

<sup>b</sup>January 1, 2018 through February 12, 2020

<sup>c</sup>February 13, 2020 through July 31, 2020

<sup>d</sup>Riverside, CA and Cincinnati, OH are excluded due to missing outcome data.

<sup>e</sup>Boston, MA; Dallas, TX; Detroit, MI; District of Columbia; Milwaukee, WI; Riverside, CA; and Sacramento, CA are excluded due to missing outcome data.

All outcomes reflect incidents (rather than victims).

Supplementary Figure 1. Change in the percentage of the city population staying “completely at home,” 16 US cities<sup>a</sup> February 13, 2020 through July 31, 2020

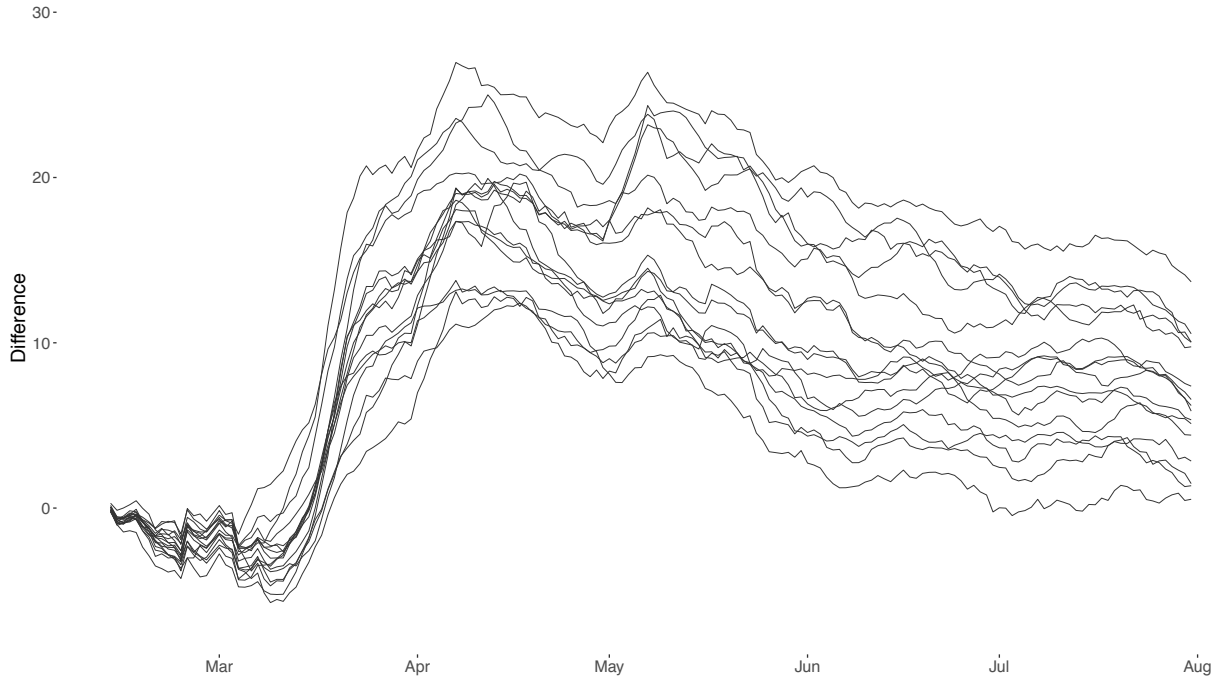

Data source: SafeGraph. Estimates reflect the change in the city population staying “completely at home” compared to the week ending February 12, 2020.<sup>1</sup> Trends are 7-day moving averages.

<sup>a</sup>Cities include: Baltimore, MD; Boston, MA; Chicago, IL; Cincinnati, OH; Dallas, TX; Denver, CO; Detroit, MI; District of Columbia; Los Angeles, CA; Milwaukee, WI; Philadelphia, PA; Phoenix, AZ; Riverside, CA; Sacramento, CA; San Francisco, CA; and Seattle, WA.

## References

1. Social Distancing Metrics. SafeGraph. Accessed October 1, 2020. <https://docs.safegraph.com/docs/social-distancing-metrics>
2. Measuring and Correcting Sampling Bias in Safegraph Patterns for More Accurate Demographic Analysis. Accessed September 30, 2020. <https://www.safegraph.com/blog/measuring-and-correcting-sampling-bias-for-accurate-demographic-analysis>
3. Gun Violence Archive. Accessed September 25, 2020. <https://www.gunviolencearchive.org/>
4. *Police Brutality During the 2020 George Floyd Protests*. 2020. Accessed September 25, 2020. <https://github.com/2020PB/police-brutality>
5. Count Love. Accessed October 1, 2020. <https://countlove.org/>
6. CSSE at Johns Hopkins University. *COVID-19 Data Repository by the Center for Systems Science and Engineering (CSSE) at Johns Hopkins University*; 2020. Accessed October 1, 2020. <https://github.com/CSSEGISandData/COVID-19>
7. PRISM Climate Group, Oregon State U. Accessed October 1, 2020. <https://prism.oregonstate.edu/explorer/>
8. National League of Cities. Local Action Tracker, COVID-19 Pandemic Response. COVID-19 Pandemic Response. Accessed October 7, 2020. <https://covid19.nlc.org/resources/covid-19-local-action-tracker/>
